# Supplementary material
Source: MDPI journal article supplement (https://www.mdpi.com/2624-862X/3/3/40)
Supplement: s1 [file s1]

Supplementary Table

Table S1. Mean squares and probabilities (in parentheses) of the functional properties (solubility, EAI<sup>1</sup>, FO<sup>2</sup>, FD<sup>3</sup>, SHI<sup>4</sup>) of SMP<sup>5</sup>, NDM<sup>6</sup> (Nov'09 to Feb'10) stored for 3, 9, and 15 months at room temperature

| Factors                      | df | Solubility     | EAI                | FO                  | FD                  | SHI                 |
|------------------------------|----|----------------|--------------------|---------------------|---------------------|---------------------|
| Powder Type                  | 1  | 1.77<br>(0.26) | 0.0032*<br>(0.004) | 80656*<br>(<0.0001) | 12.37*<br>(<0.0001) | 40133*<br>(<0.0001) |
| Replicates                   | 2  | 1.02<br>(0.47) | 0.0002<br>(0.42)   | 1288*<br>(0.007)    | 0.31*<br>(0.04)     | 1574*<br>(<0.0001)  |
| Time                         | 2  | 1.39<br>(0.36) | 0.0001<br>(0.56)   | 1243*<br>(0.008)    | 0.44*<br>(0.02)     | 718*<br>(0.004)     |
| Season                       | 1  | 0.25<br>(0.67) | 0.000006<br>(0.88) | 2.25<br>(0.91)      | 0.42*<br>(0.04)     | 178<br>(0.19)       |
| Powder Type *<br>Replicates  | 2  | 1.96<br>(0.24) | 0.0001<br>(0.60)   | 1191*<br>(0.01)     | 0.08<br>(0.41)      | 1053*<br>(0.0006)   |
| Powder Type *<br>Season      | 1  | 4.69<br>(0.07) | 0.0005<br>(0.17)   | 191<br>(0.33)       | 0.16<br>(0.19)      | 121<br>(0.27)       |
| Powder Type<br>*Time         | 2  | 0.92<br>(0.51) | 0.0001<br>(0.58)   | 222<br>(0.35)       | 0.16<br>(0.18)      | 90<br>(0.41)        |
| Powder Type<br>*Time* Season | 7  | 0.99<br>(0.56) | 0.0001<br>(0.83)   | 383<br>(0.15)       | 0.09<br>(0.39)      | 213<br>(0.10)       |
| Error                        | 20 | 1.31           | 0.0003             | 200                 | 0.09                | 96.14               |

\* Statistically significant ( $p < 0.05$ )

<sup>1</sup>EAI = emulsification ability index; <sup>2</sup>FO= foam overrun; <sup>3</sup>FD= foam drainage; <sup>4</sup>SHI = surface hydrophobicity index;  
<sup>5</sup>SMP=skimmed milk powder; <sup>6</sup>NDM= non-fat milk powder;
